# Supplementary material for: “Things Have Changed”—Laparoscopic Cytoreduction for Advanced and Recurrent Ovarian Cancer: The Experience of a Referral Center on 108 Patients
Source: MDPI journal article supplement (doi:10.3390/cancers15245726), 2023-12-06
Supplement: s1 [file s1]

Supplemental material

Supplementary Table 1. Overall survival after surgical approaches for ovarian cancer

| SURGERY | OVERALL SURVIVAL |         |         |         |         |         |
|---------|------------------|---------|---------|---------|---------|---------|
|         | 6 months         | 1 years | 2 years | 3 years | 4 years | 5 years |
| PDS     | 100%             | 93%     | 89%     | 84%     | 73%     | 67%     |
| IDS     | 95%              | 92%     | 82%     | 66%     | 40%     | 32%     |
| SDS     | 96%              | 96%     | 80%     | 63%     | 58%     | 58%     |

PDS: Primary Debulking Surgery; IDS: Interval Debulking Surgery; SDS: Secondary Debulking Surgery

Supplementary Table 2. Disease-free survival after surgical approaches for ovarian cancer

| SURGERY | DISEASE FREE SURVIVAL |         |         |         |         |         |
|---------|-----------------------|---------|---------|---------|---------|---------|
|         | 6 months              | 1 years | 2 years | 3 years | 4 years | 5 years |
| PDS     | 100%                  | 86%     | 54%     | 48%     | 48%     | 40%     |
| IDS     | 93%                   | 76%     | 64%     | 51%     | 30%     | 30%     |
| SDS     | 96%                   | 92%     | 80%     | 71%     | 58%     | 54%     |

PDS: Primary Debulking Surgery; IDS: Interval Debulking Surgery; SDS: Secondary Debulking Surgery

**Supplementary Table 3.** Main studies on laparoscopic/laparotomic surgeries for advanced ovarian cancer

| Authors, year            | Study         | Surgery |     | Pts (n) | FIGO stage              | Residual Tumor (% (RT)) | Estimated blood loss (mL) | Complications IO (%) | Complications PO (%) | OS                      | PFS                     |
|--------------------------|---------------|---------|-----|---------|-------------------------|-------------------------|---------------------------|----------------------|----------------------|-------------------------|-------------------------|
| Ceccaroni, 2018 [7]      | Prospective   | LPS     | PDS | 21      | IIIA1/IV                | 95.3 (=0)               | 250                       | 0.0                  | 19                   | 47.3 mo                 | 42.3 mo                 |
|                          |               | LPT     |     | 45      |                         | 88.4 (=0)               | 650                       | 17.8                 | 46.7                 | 52.3 mo                 | 45.2 mo                 |
| Liang, 2017 [30]         | Retrospective | LPS     | PDS | 64      | II/III/IV               | 85.9 (=0)               | 232                       | 4.7                  | 7.8                  | 88.7% of pts at 3 years | 55.5% of pts at 3 years |
|                          |               | LPT     |     | 68      |                         | 67.6 (=0)               | 770                       | 5.9                  | 16.2                 | 83.7% of pts at 3 years | 33.3% of pts at 3 years |
| Melamed, 2017 [31]       | Retrospective | LPS     | IDS | 450     | IIIC/IV                 | 46.9 (=0)               | -                         | -                    | -                    | 33.8 mo                 | -                       |
|                          |               | LPT     |     | 2621    |                         | 49.5 (=0)               | -                         | -                    | -                    | 37.6 mo                 | -                       |
| Gueli Alletti, 2016 [20] | Retrospective | LPS     | IDS | 30      | advanced ovarian cancer | 96.6 (=0)               | 100                       | -                    | 0                    | -                       | 18mo                    |
|                          |               | LPT     |     | 65      |                         | 95.4 (=0)               | 200                       | -                    | 2 cases              | -                       | 12mo                    |
| Nezhat, 2012 [21]        | Retrospective | LPS     | SDS | 19      | I/II/III                | 78.9 (<1cm)             | 50                        | 0                    | 7.1                  | -                       | 74.7% of pts at 6 mo    |

LPS: laparoscopy; LPT: laparotomy; PDS: primary debulking surgery; IDS: interval debulking surgery; IO: intraoperative; PO: postoperative; OS: overall survival; PFS: progression-free survival; mo: months; SDS: Secondary Debulking Surgery; pts: patients
